# Supplementary material for: Maturases and Group II Introns in the Mitochondrial Genomes of the Deepest Jakobid Branch
Source: PubMed Central journal article supplement — Genome Biol Evol. 2023 Apr 8;15(4):evad058. doi: 10.1093/gbe/evad058 (PMC10139444; doi:10.1093/gbe/evad058), 2023-04-08
Supplement: evad058_supplementary_data.pdf [file evad058_supplementary_data.pdf]

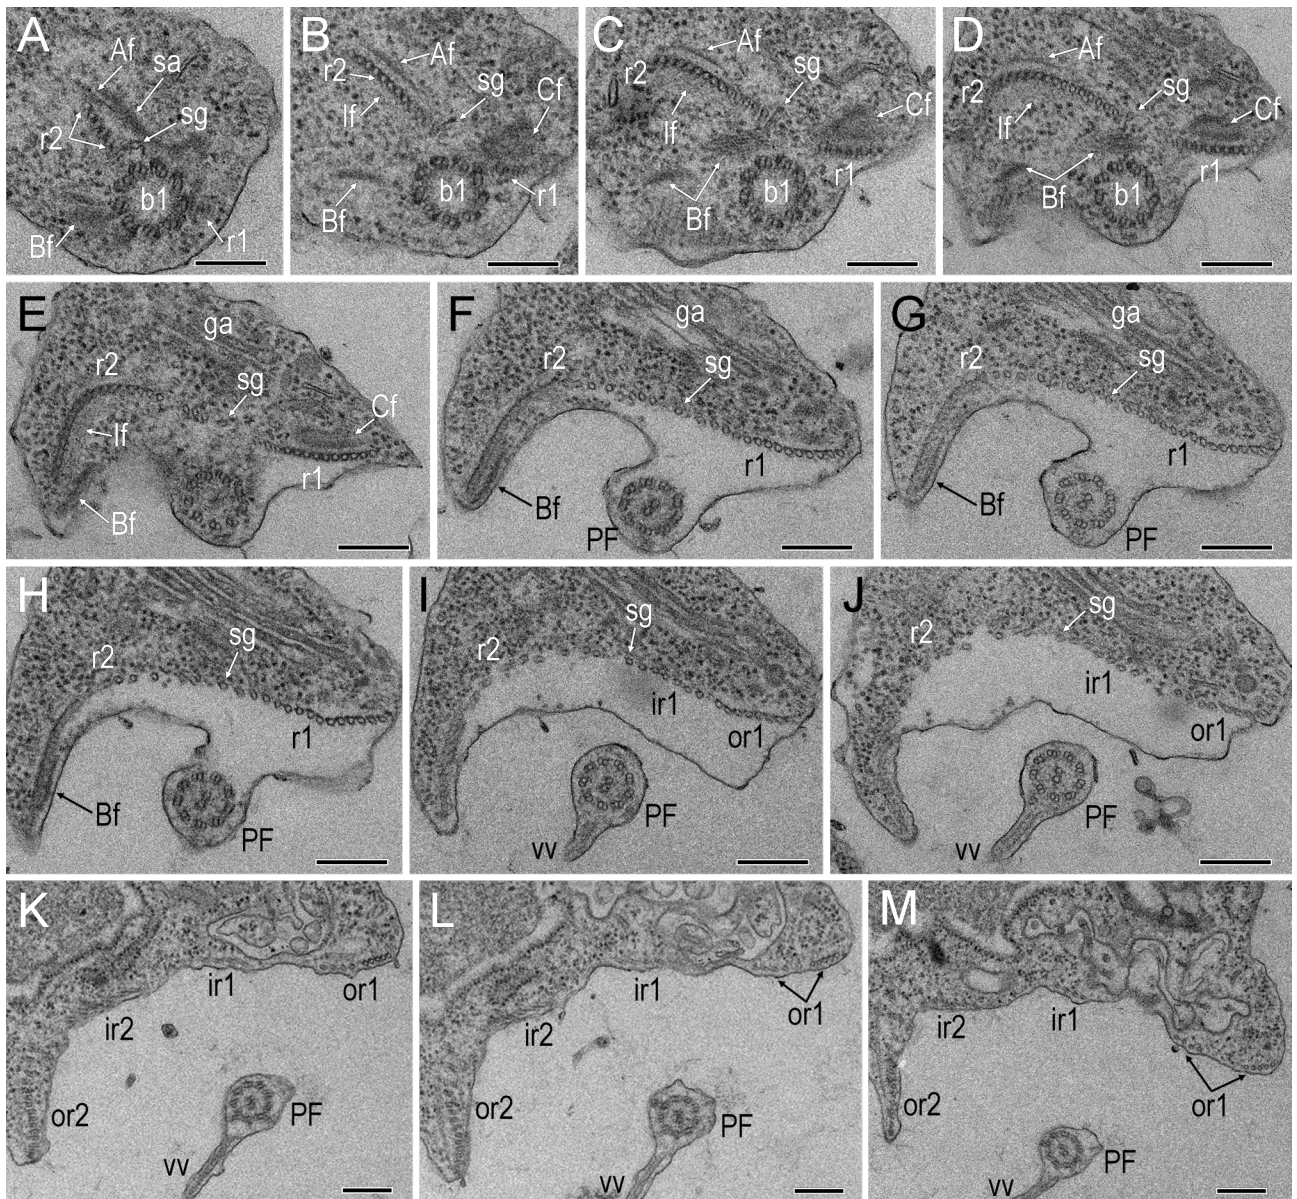

**Figure S1. Transmission electron micrographs of *Agogonia voluta* gen et sp. nov.** (A–J) Serial transverse sections of anterior part of the cell, showing origin and orientations of roots and fibres, with a more clearly visualized left root. (K–L) Serial transverse sections showing localization of the roots in the middle part of the cell. Scale bars: 200 nm. Af – ‘A’ fibre; b1 – basal body of the posterior flagellum; Bf – ‘B’ fibre; Cf – ‘C’ fibre; ga – Golgi apparatus; lf – ‘l’ fibre; ir1 – inner portion of left root; ir2 – inner portion of right root; or1 – outer portion of left root; or2 – outer portion of right root; PF – posterior flagellum; r1 – left root; r2 – right root; sa – singlet-associated fibre; sg – singlet root; vv – ventral vane of posterior flagellum.



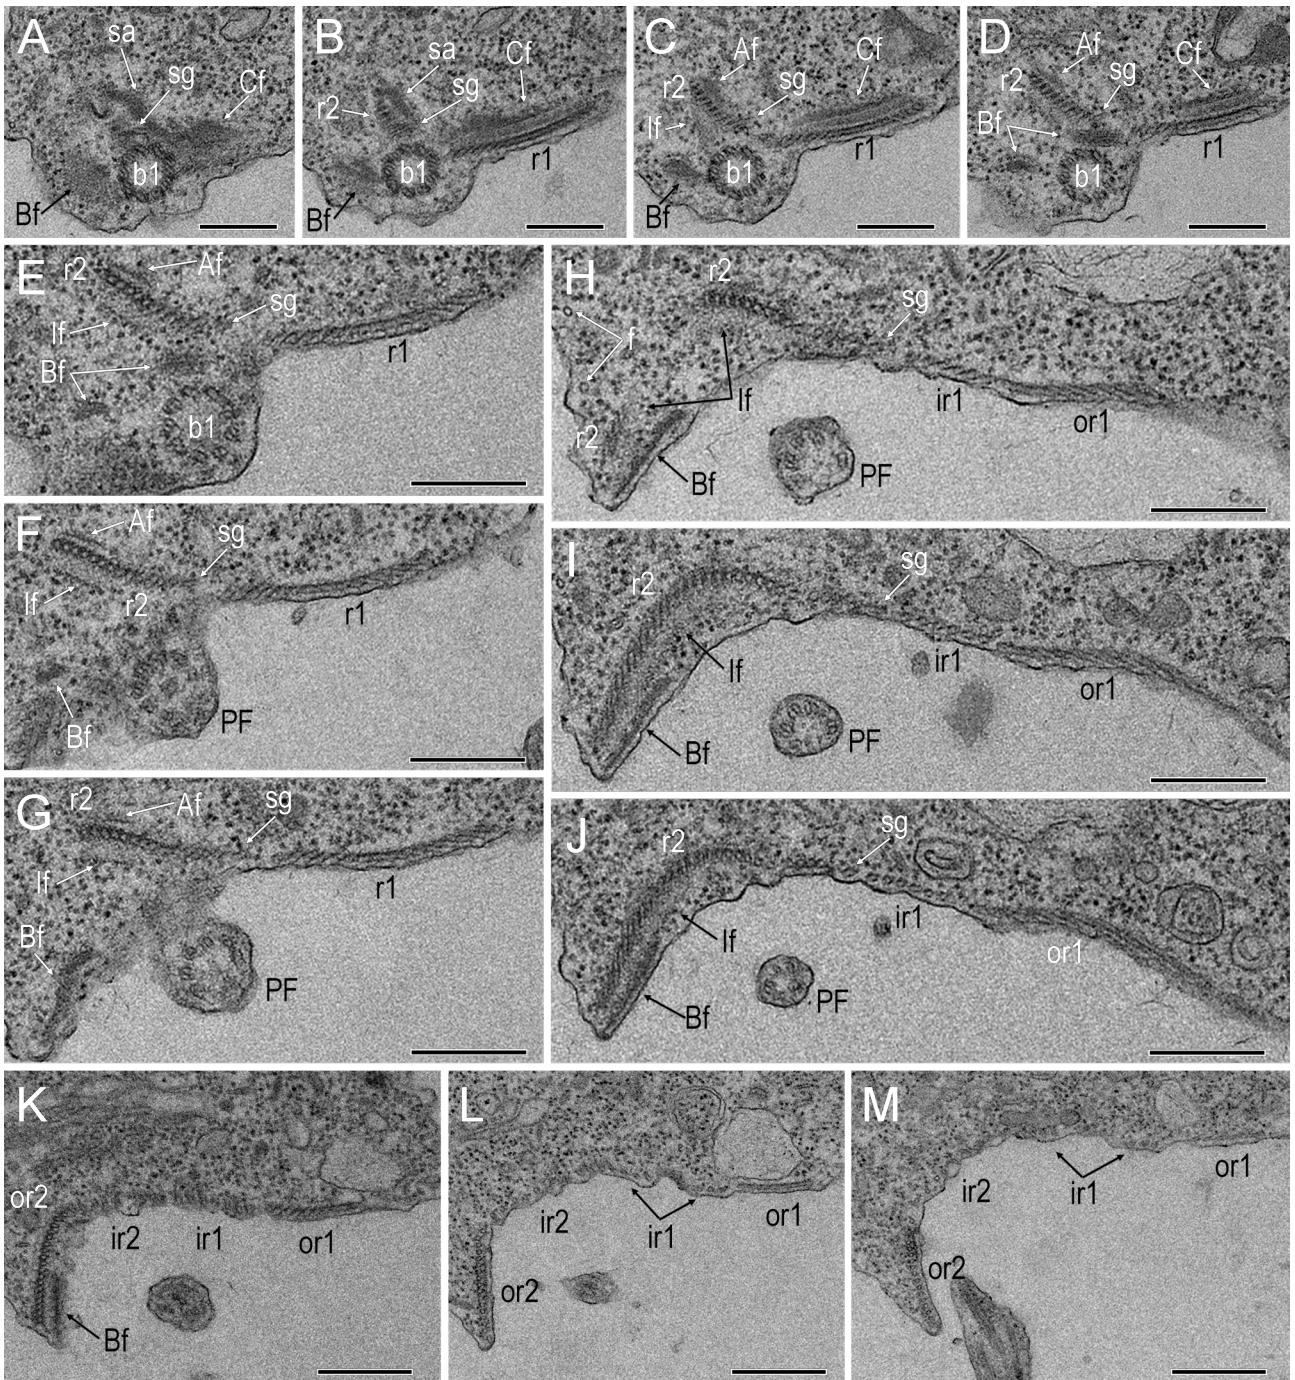

**Figure S2. Transmission electron micrographs of *Agogonia voluta* gen et sp. nov.** (A–J) Serial transverse sections of anterior part of the cell, showing origin and orientations of roots and fibres, with a more clearly visualized right root. (K–M) Serial transverse sections showing localization of the roots in the middle part of the cell. Scale bars: 300 nm. Af – ‘A’ fibre; b1 – basal body of the posterior flagellum; Bf – ‘B’ fibre; Cf – ‘C’ fibre; f – dorsal fan microtubules; lf – ‘l’ fibre; ir1 – inner portion of left root; ir2 – inner portion of right root; or1 – outer portion of left root; or2 – outer portion of right root; PF – posterior flagellum; r1 – left root; r2 – right root; sa – singlet-associated fibre; sg – singlet root.



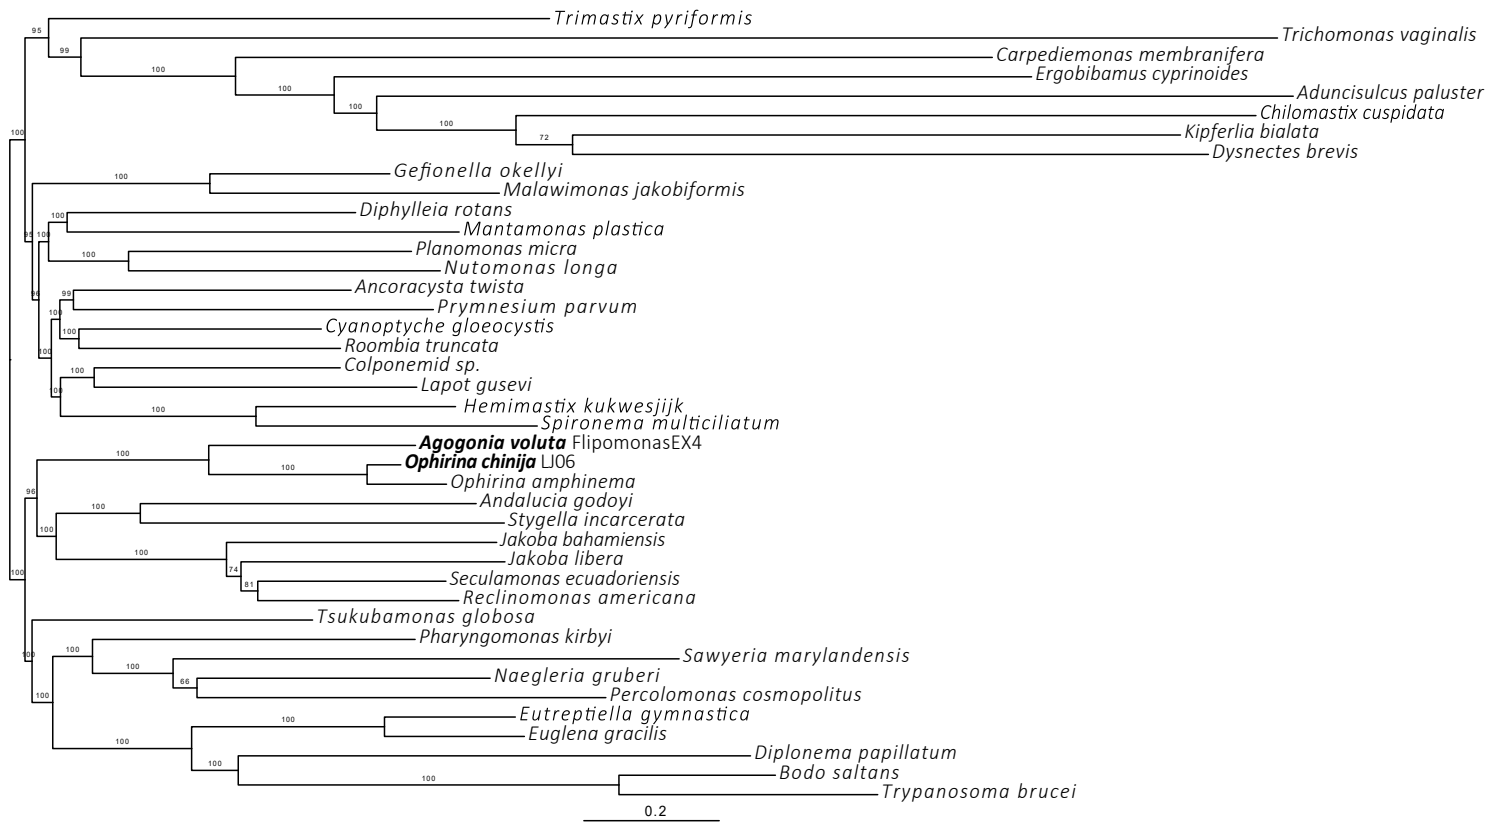

**Figure S3. Maximum likelihood tree based on the dataset from Lax et al. 2018.** The tree was reconstructed using 350 conserved proteins, 41 species, and 112,726 conserved amino acid positions, it was inferred with IQ-TREE using the PMSF approximation of the model LG+C60+F+R7 and ultrafast bootstrap as statistical support (shown over the branches).







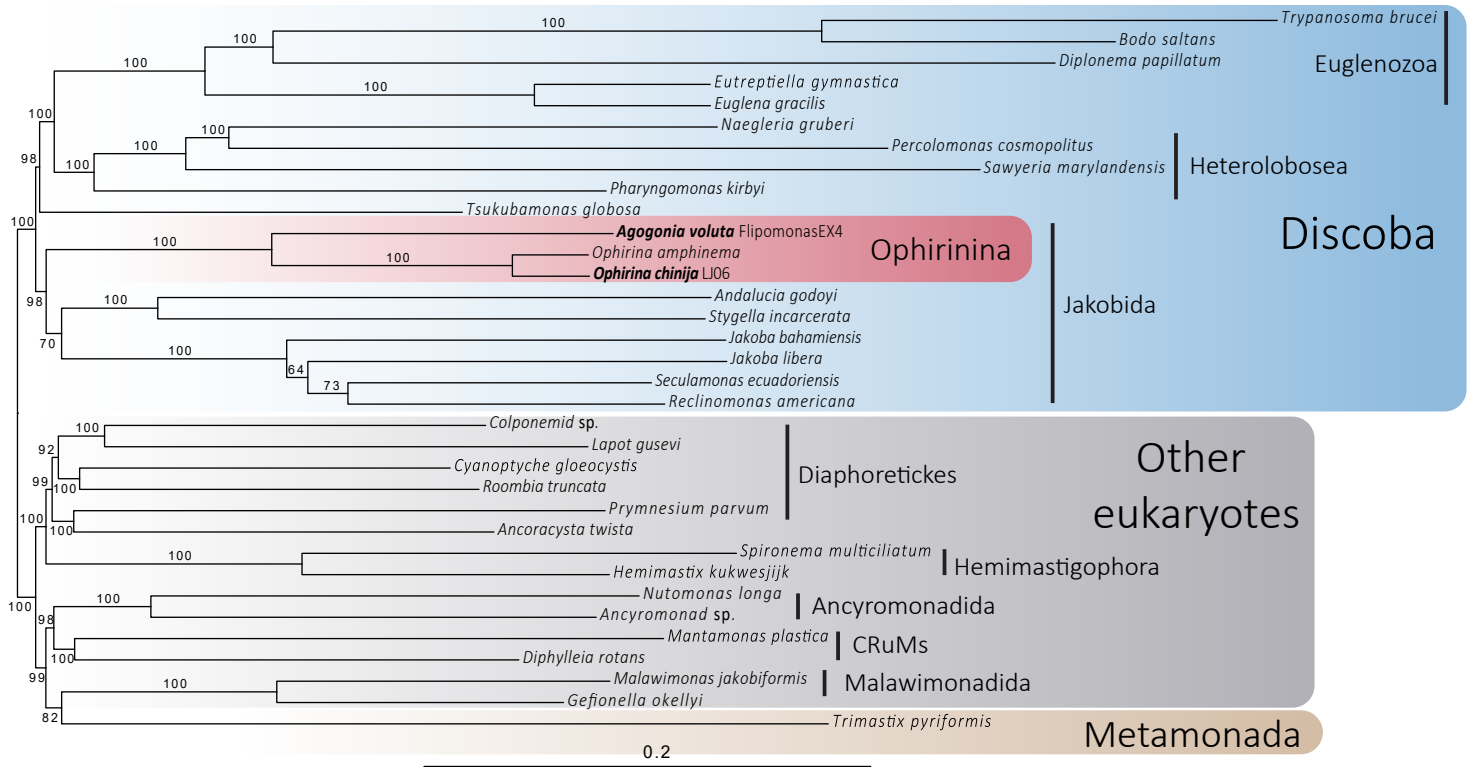

**Figure S5. Maximum likelihood tree based on the dataset from Lax et al. 2018.** The tree was reconstructed using 350 conserved proteins, 34 species (with the short-branching species *Trimastix pyriformis* as only representative of Metamonada), and 112,726 conserved amino acid positions. It was inferred with IG-TREE using the PMSF approximation of the model LG+C60+F+R7 and ultrafast bootstrap as statistical support (shown over the branches).



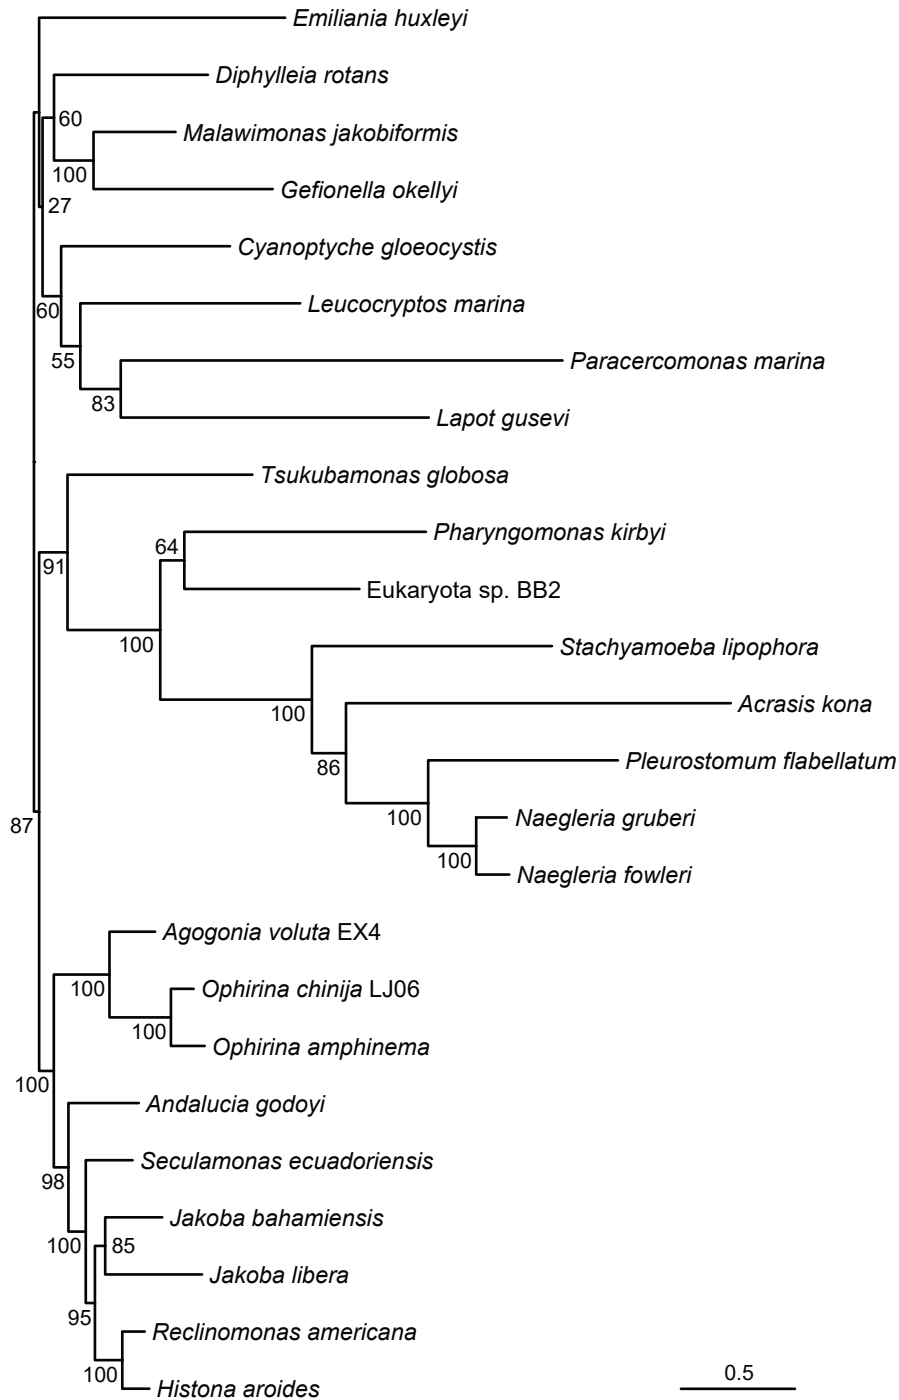

**Figure S6. Maximum likelihood tree based on 14 conserved mitochondrion-encoded proteins.** The tree was reconstructed using 25 species and 4,663 conserved amino acid positions. It was inferred with IQ-TREE using the PMSF approximation of the model LG+C60+F+R7 and ultrafast bootstrap as statistical support (shown next to the branches)
